# Supplementary material for: Use of the University of Minnesota Biocatalysis/Biodegradation Database for study of microbial degradation
Source: Springer Nature journal article supplement (doi:10.1186/2042-5783-2-1), 2012-01-04
Supplement: 13309_2011_14_MOESM3_ESM.pdf [file 13309_2011_14_MOESM3_ESM.pdf]

## A. Aerobic Likelihood

Very likely   Likely   Neutral   Unlikely   Very unlikely   Unknown

## B. Relative Reasoning

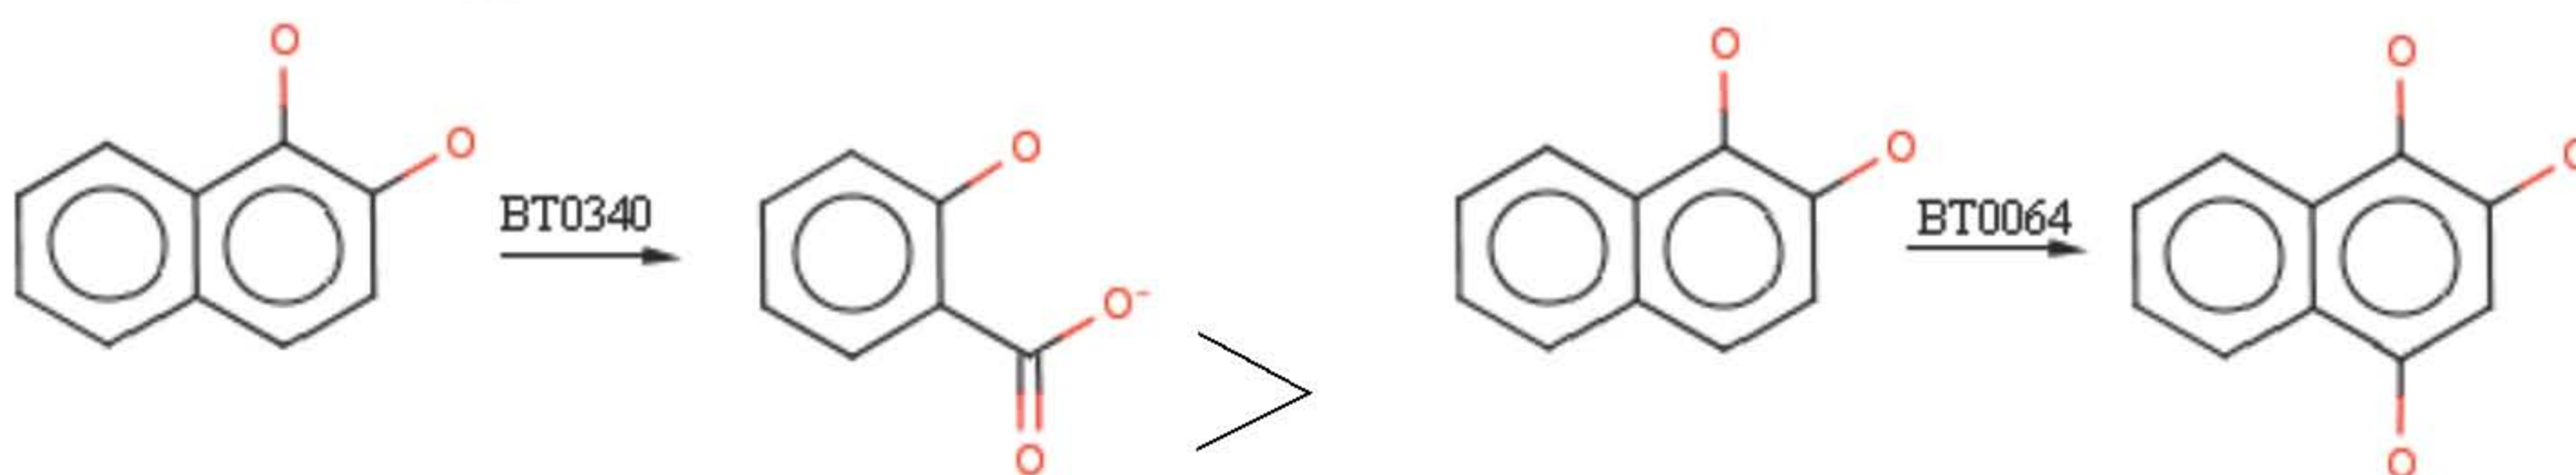

## C. Super Rules

e.g., bt0340 combines 4 rules to predict naphthalene degradation in one step

## D. Variable Aerobic Likelihood

e.g., bt0340 aerobic likelihood

“Likely” without halogen on substrate

“Neutral” with halogen on substrate
